# Supplementary material for: A simulation study on the subdiffusion of polymer chains in crowded environments containing nanoparticles
Source: Royal Society of Chemistry journal article supplement (doi:10.1039/d1cp03926a), 2021-12-27
Supplement: d1cp03926a1.pdf [file d1cp03926a1.pdf]

## Supporting Information

### Simulation study on the subdiffusion of polymer chains in crowded environments containing nanoparticles

Rong-Xing Lu<sup>1</sup>, Jian-Hua Huang<sup>1\*</sup>, Meng-Bo Luo<sup>2</sup>

<sup>1</sup> *Department of Chemistry, Key Laboratory of Surface & Interface Science of Polymer Materials of Zhejiang Province, Zhejiang Sci-Tech University, Hangzhou 310018, China.*

<sup>2</sup> *Department of Physics, Zhejiang University, Hangzhou 310027, China.*

\*Corresponding author. Email: jhhuang@zstu.edu.cn

1. The diffusion exponent  $\alpha$  is roughly independent of the damping constant  $\Gamma$ , though the mean square displacement  $\langle \Delta r^2(t) \rangle$  of polymer chain is larger for smaller  $\Gamma$  since the viscosity is proportional to  $\Gamma$ .

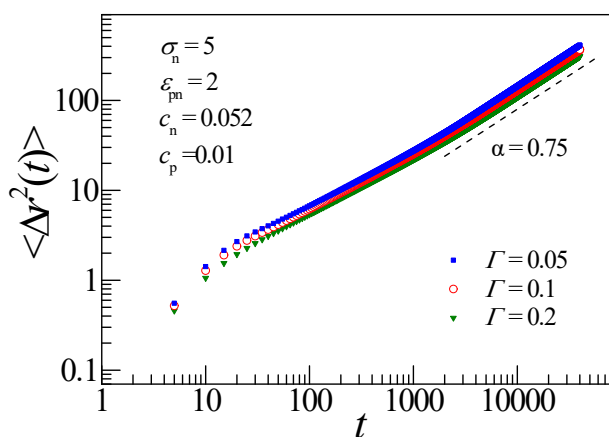

**Fig. S1** Log-log plot of  $\langle \Delta r^2(t) \rangle$  versus simulation time  $t$  for the system with  $c_p = 0.01$  and  $c_n = 0.052$  under three  $\Gamma$  values. The dashed straight line shows the diffusion exponent  $\alpha = 0.75$ .

2. Time averaged number of contacted NPs for every polymer chain in one simulation sample at different polymer concentrations.

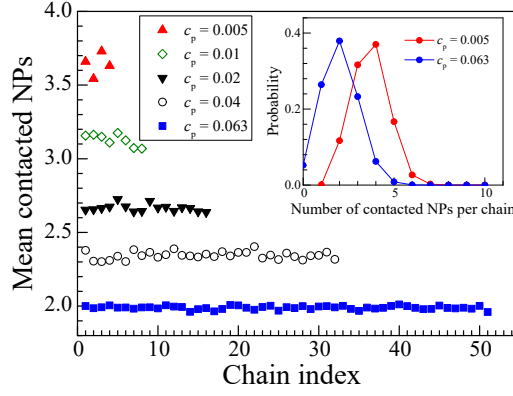

**Fig. S2** Time averaged number of contacted NPs of each polymer chain in one simulation sample at five polymer concentrations with  $c_n = 0.052$  and  $\sigma_n = 5$ . Inset: Probability distribution of the number of contacted NPs per chain.

3. The variation of diffusive exponent  $\alpha$  with  $c_n$  is similar for different polymer concentrations. With an increase in  $c_n$ ,  $\alpha$  drops and gradually approaches a convergent value. The convergent value  $\alpha_{\text{conv}}$  increases with  $c_p$  and finally tends to 1.

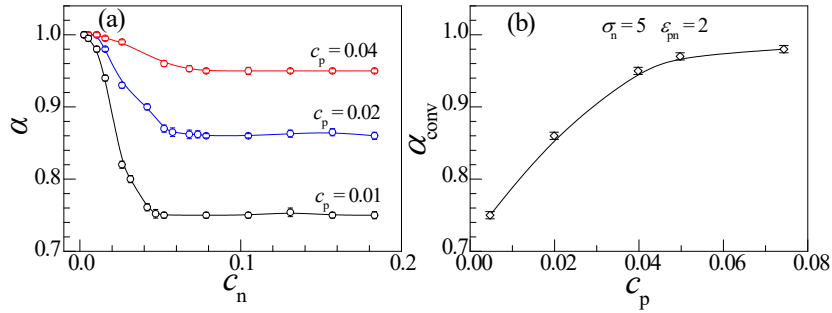

**Fig. S3** (a) The diffusive exponent  $\alpha$  as a function of NP concentration  $c_n$  for three polymer concentrations  $c_p = 0.01, 0.02,$  and  $0.04$ . (b) Variation of the convergent value  $\alpha_{\text{conv}}$  with  $c_p$ .
